# Supplementary material for: Treatment of esophageal cancer with radiation therapy: a pan-Chinese survey of radiation oncologists
Source: PubMed Central journal article supplement (PMC5471024; doi:10.18632/oncotarget.16858), 2017-04-05
Supplement: oncotarget-08-34946-s001.pdf [file oncotarget-08-34946-s001.pdf]

## **Treatment of esophageal cancer with radiation therapy: a pan-Chinese survey of radiation oncologists**

### **Supplementary Materials**

**Supplementary Table 1: Survey questions posed to respondents.** See [Supplementary\\_Table\\_1](#)
